# Supplementary material
Source: PubMed Central journal article supplement (PMC6408614)
Supplement: rspb20182313supp2.pdf [file rspb20182313supp2.pdf]

m is the distance in trait value  
 e between optimal value and pop mean  
 $\sigma$  is the standard dev of trait value distributions in the pop  
 k is the steepness of the trait to condition function  
 s is the survival parameter  
 a is max female fecundity  
 g is the strength of sexual selection  
 t is the size of competing groups of males  
 r is the number of repeated fitness measures for each male  
 d is the resolution of the condition to fitness function for males, i.e. how many focal individuals did we consider to draw that curve.

m = 0;  
 $\sigma$  = 1;  
 k = 5;  
  
 a = 50;  
 g = 10;  
 t = 10;  
 r = 25;  
 d = 10;

### Distribution of trait values, condition, condition after survival.

$$f[z_, m_, \sigma_] := \frac{e^{-\frac{1}{2} \left(\frac{z-m}{\sigma}\right)^2}}{\sigma \sqrt{2 \pi}}$$

$$\text{cond}[z_, k_] := e^{-(z)^2/k}$$

$$\text{invcond1}[c_, k_] := -\sqrt{k} \sqrt{\text{Log}\left[\frac{1}{c}\right]}$$

$$\text{invcond2}[c_, k_] := \sqrt{k} \sqrt{\text{Log}\left[\frac{1}{c}\right]}$$

$$\text{fcond}[c_, m_, \sigma_, k_] :=$$

$$\left(f[\text{invcond1}[c, k], m, \sigma] + f[\text{invcond2}[c, k], m, \sigma]\right) * \frac{\sqrt{k}}{2 c \sqrt{\text{Log}\left[\frac{1}{c}\right]}}$$

$$\text{surv}[c_, s_] := c (s + 1) / (s + c)$$

$$\text{marginalsurv}[c_, m_, \sigma_, k_, s_] := \text{fcond}[c, m, \sigma, k] * \text{surv}[c, s]$$

$$\text{fcad}[c_, m_, \sigma_, k_, s_] := \frac{\text{marginalsurv}[c, m, \sigma, k, s]}{\text{NIntegrate}[\text{marginalsurv}[cc, m, \sigma, k, s], \{cc, 0, 1\}]}$$

## Male female covariance in fitness

```

covarmf[res_, rep_, g_, t_, m_, s_] := (
  Conditions = {};
  Densities = {};
  For[
    i = 1,
    i ≤ res - 1,
    i++,
    AppendTo[Conditions, (i + 0.5) / res];
    AppendTo[Densities, NIntegrate[fcond[c, m, σ, k], {c, i / res, (i + 1) / res}]];
  ];
  fc = ProbabilityDistribution[fcond[c, m, σ, k], {c, 0, 1}];

  malefit =
    Table[Mean[Table[
$$\frac{\text{Conditions}[[i]]^g}{\text{Conditions}[[i]]^g + \text{Total}[\text{RandomVariate}[\text{fc}, t - 1]^g]}$$
 *
      t * surv[Conditions[[i]], s], rep]], {i, 1, res - 1}];

  femfit = Table[Conditions[[i]] * a * surv[Conditions[[i]], s], {i, 1, res - 1}];

  meanmalefitness = Densities.malefit;
  meanfemfitness = Densities.femfit;
  covar = Densities.((malefit - meanmalefitness) * (femfit - meanfemfitness));
  covarrelative = covar / (meanmalefitness * meanfemfitness);
  covarrelative)

```

## Males variance in relative fitness

```

res = 50;
rep = 2;
g = 1;
m = 2;
t = 2;

```

```

varmales[res_, rep_, g_, t_, m_, s_] := (
  Conditions = {};
  Densities = {};
  For[
    i = 1,
    i ≤ res - 1,
    i++,
    AppendTo[Conditions, (i + 0.5) / res];
    AppendTo[Densities, NIntegrate[fcond[c, m, σ, k], {c, i / res, (i + 1) / res}]];
  ];
  fc = ProbabilityDistribution[fcond[c, m, σ, k], {c, 0, 1}];

  malefit = Table[Mean[Table[(Conditions[[i]]^g /
    (Conditions[[i]]^g + Total[RandomVariate[fc, t - 1]^g))] *
    t * surv[Conditions[[i], s], rep]], {i, 1, res - 1}];

  meanmalefitness = Densities.malefit;
  varmalefitness = Densities.(malefit - meanmalefitness)^2;
  varmalerelative = varmalefitness / (meanmalefitness)^2;
  varmalerelative)

```

---

## Females variance in relative fitness

```

varfem[res_, a_, b_, m_, s_] := (
  Conditions = {};
  Densities = {};
  For[
    i = 1,
    i ≤ res - 1,
    i++,
    AppendTo[Conditions, (i + 0.5) / res];
    AppendTo[Densities, NIntegrate[fcond[c, m, σ, k], {c, i / res, (i + 1) / res}]];
  ];

  femfit = Table[Conditions[[i]]^b * a * surv[Conditions[[i], s], {i, 1, res - 1}];

  meanfemfitness = Densities.femfit;
  varfemfitness = Densities.(femfit - meanfemfitness)^2;
  varfemrelative = varfemfitness / (meanfemfitness)^2;
  varfemrelative)

```
